# Supplementary material
Source: Research Square preprint supplement (doi:10.21203/rs.3.rs-9165453/v1)
Supplement: Supplementary file [file 432235904680869e5166670a.pdf]

*Supplementary Material of “Development of a Temperature-Dependent Chemical Simulation Code based on PHITS for Water Radiolysis from 0 to 350°C”*

**Table S1.** Numerical values of the diffusion coefficients ( $10^{-9}$  m<sup>2</sup>/sec) considered in the PHITS-Chem code

| °C  | 1/K     | ·OH   | e <sup>-</sup> <sub>aq</sub> | H <sup>+</sup> | H <sub>3</sub> O <sup>+</sup> | H <sub>2</sub> | H <sub>2</sub> O <sub>2</sub> | HO <sub>2</sub> <sup>·</sup> | O <sub>2</sub> | OH <sup>-</sup> | O <sub>2</sub> <sup>-</sup> | HO <sub>2</sub> <sup>-</sup> | ·O    | O <sup>-</sup> | tris  | DMSO  |
|-----|---------|-------|------------------------------|----------------|-------------------------------|----------------|-------------------------------|------------------------------|----------------|-----------------|-----------------------------|------------------------------|-------|----------------|-------|-------|
| 0   | 0.00366 | 1.40  | 2.20                         | 3.33           | 5.51                          | 2.34           | 1.08                          | 0.94                         | 1.12           | 2.50            | 0.98                        | 0.65                         | 0.94  | 1.31           | 0.47  | 0.51  |
| 10  | 0.00353 | 1.91  | 2.97                         | 4.69           | 6.96                          | 3.29           | 1.51                          | 1.31                         | 1.58           | 3.42            | 1.38                        | 0.92                         | 1.31  | 1.84           | 0.66  | 0.72  |
| 20  | 0.00341 | 2.49  | 3.94                         | 6.20           | 8.51                          | 4.39           | 2.02                          | 1.76                         | 2.11           | 4.45            | 1.85                        | 1.23                         | 1.76  | 2.46           | 0.88  | 0.97  |
| 25  | 0.00335 | 2.80  | 4.50                         | 7.00           | 9.30                          | 5.00           | 2.30                          | 2.00                         | 2.40           | 5.00            | 2.10                        | 1.40                         | 2.00  | 2.80           | 1.00  | 1.10  |
| 30  | 0.00330 | 3.12  | 5.12                         | 7.81           | 10.10                         | 5.64           | 2.59                          | 2.26                         | 2.71           | 5.57            | 2.37                        | 1.58                         | 2.26  | 3.16           | 1.13  | 1.24  |
| 40  | 0.00319 | 3.79  | 6.55                         | 9.47           | 11.73                         | 7.01           | 3.22                          | 2.80                         | 3.36           | 6.76            | 2.94                        | 1.96                         | 2.80  | 3.92           | 1.40  | 1.54  |
| 50  | 0.00309 | 4.48  | 8.24                         | 11.14          | 13.36                         | 8.48           | 3.90                          | 3.39                         | 4.07           | 8.01            | 3.56                        | 2.37                         | 3.39  | 4.75           | 1.70  | 1.87  |
| 60  | 0.00300 | 5.20  | 10.24                        | 12.79          | 14.99                         | 10.05          | 4.62                          | 4.02                         | 4.82           | 9.28            | 4.22                        | 2.81                         | 4.02  | 5.63           | 2.01  | 2.21  |
| 70  | 0.00291 | 5.92  | 12.56                        | 14.40          | 16.59                         | 11.70          | 5.38                          | 4.68                         | 5.61           | 10.57           | 4.91                        | 3.28                         | 4.68  | 6.55           | 2.34  | 2.57  |
| 80  | 0.00283 | 6.65  | 15.22                        | 15.97          | 18.16                         | 13.42          | 6.18                          | 5.37                         | 6.44           | 11.87           | 5.64                        | 3.76                         | 5.37  | 7.52           | 2.68  | 2.95  |
| 90  | 0.00275 | 7.37  | 18.26                        | 17.51          | 19.71                         | 15.23          | 7.00                          | 6.09                         | 7.31           | 13.17           | 6.40                        | 4.26                         | 6.09  | 8.53           | 3.05  | 3.35  |
| 100 | 0.00268 | 8.10  | 21.69                        | 19.00          | 21.21                         | 17.10          | 7.87                          | 6.84                         | 8.21           | 14.46           | 7.18                        | 4.79                         | 6.84  | 9.58           | 3.42  | 3.76  |
| 110 | 0.00261 | 8.82  | 25.54                        | 20.46          | 22.68                         | 19.05          | 8.76                          | 7.62                         | 9.14           | 15.76           | 8.00                        | 5.33                         | 7.62  | 10.67          | 3.81  | 4.19  |
| 120 | 0.00254 | 9.55  | 29.82                        | 21.90          | 24.11                         | 21.07          | 9.69                          | 8.43                         | 10.12          | 17.05           | 8.85                        | 5.90                         | 8.43  | 11.80          | 4.21  | 4.64  |
| 130 | 0.00248 | 10.26 | 34.55                        | 23.33          | 25.51                         | 23.18          | 10.66                         | 9.27                         | 11.12          | 18.33           | 9.73                        | 6.49                         | 9.27  | 12.98          | 4.64  | 5.10  |
| 140 | 0.00242 | 10.98 | 39.74                        | 24.76          | 26.87                         | 25.36          | 11.67                         | 10.14                        | 12.17          | 19.61           | 10.65                       | 7.10                         | 10.14 | 14.20          | 5.07  | 5.58  |
| 150 | 0.00236 | 11.69 | 45.42                        | 26.19          | 28.21                         | 27.64          | 12.71                         | 11.05                        | 13.27          | 20.88           | 11.61                       | 7.74                         | 11.05 | 15.48          | 5.53  | 6.08  |
| 160 | 0.00231 | 12.41 | 51.58                        | 27.63          | 29.51                         | 30.00          | 13.80                         | 12.00                        | 14.40          | 22.15           | 12.60                       | 8.40                         | 12.00 | 16.80          | 6.00  | 6.60  |
| 170 | 0.00226 | 13.12 | 58.25                        | 29.10          | 30.80                         | 32.47          | 14.93                         | 12.99                        | 15.58          | 23.43           | 13.64                       | 9.09                         | 12.99 | 18.18          | 6.49  | 7.14  |
| 180 | 0.00221 | 13.84 | 65.43                        | 30.59          | 32.05                         | 35.03          | 16.12                         | 14.01                        | 16.82          | 24.71           | 14.71                       | 9.81                         | 14.01 | 19.62          | 7.01  | 7.71  |
| 190 | 0.00216 | 14.55 | 73.12                        | 32.12          | 33.29                         | 37.71          | 17.35                         | 15.08                        | 18.10          | 25.99           | 15.84                       | 10.56                        | 15.08 | 21.12          | 7.54  | 8.30  |
| 200 | 0.00211 | 15.27 | 81.33                        | 33.69          | 34.51                         | 40.50          | 18.63                         | 16.20                        | 19.44          | 27.28           | 17.01                       | 11.34                        | 16.20 | 22.68          | 8.10  | 8.91  |
| 220 | 0.00203 | 16.73 | 99.34                        | 36.98          | 36.89                         | 46.45          | 21.37                         | 18.58                        | 22.30          | 29.88           | 19.51                       | 13.01                        | 18.58 | 26.01          | 9.29  | 10.22 |
| 240 | 0.00195 | 18.22 | 119.46                       | 40.51          | 39.22                         | 52.92          | 24.34                         | 21.17                        | 25.40          | 32.53           | 22.23                       | 14.82                        | 21.17 | 29.64          | 10.58 | 11.64 |
| 260 | 0.00188 | 19.73 | 141.68                       | 44.30          | 41.51                         | 59.96          | 27.58                         | 23.98                        | 28.78          | 35.23           | 25.18                       | 16.79                        | 23.98 | 33.58          | 11.99 | 13.19 |
| 280 | 0.00181 | 21.28 | 165.96                       | 48.40          | 43.77                         | 67.61          | 31.10                         | 27.05                        | 32.45          | 38.00           | 28.40                       | 18.93                        | 27.05 | 37.86          | 13.52 | 14.87 |
| 300 | 0.00174 | 22.87 | 192.28                       | 52.83          | 46.00                         | 75.91          | 34.92                         | 30.37                        | 36.44          | 40.84           | 31.88                       | 21.26                        | 30.37 | 42.51          | 15.18 | 16.70 |
| 310 | 0.00171 | 23.68 | 206.19                       | 55.18          | 47.11                         | 80.32          | 36.95                         | 32.13                        | 38.55          | 42.29           | 33.73                       | 22.49                        | 32.13 | 44.98          | 16.06 | 17.67 |
| 320 | 0.00169 | 24.51 | 220.57                       | 57.62          | 48.21                         | 84.90          | 39.06                         | 33.96                        | 40.75          | 43.76           | 35.66                       | 23.77                        | 33.96 | 47.55          | 16.98 | 18.68 |
| 340 | 0.00163 | 26.18 | 250.77                       | 62.79          | 50.41                         | 94.62          | 43.53                         | 37.85                        | 45.42          | 46.76           | 39.74                       | 26.49                        | 37.85 | 52.99          | 18.92 | 20.82 |
| 350 | 0.00160 | 27.04 | 266.56                       | 65.52          | 51.50                         | 99.76          | 45.89                         | 39.90                        | 47.89          | 48.29           | 41.90                       | 27.93                        | 39.90 | 55.87          | 19.95 | 21.95 |

**Table S2.** Numerical values of the reaction rate constants ( $10^{10}$  L/mol/sec) considered in the PHITS-Chem code

| °C  | 1/K     | R1    | R2    | R3     | R4    | R5    | R6     | R7     | R8     | R9    | R10   | R11  | R12   |
|-----|---------|-------|-------|--------|-------|-------|--------|--------|--------|-------|-------|------|-------|
| 0   | 0.00366 | 0.411 | 0.217 | 0.574  | 1.65  | 1.47  | 9.70   | 0.0110 | 1.07   | 1.37  | 1.18  | 1.30 | 1.22  |
| 10  | 0.00353 | 0.465 | 0.308 | 0.725  | 1.96  | 1.67  | 11.43  | 0.0129 | 1.30   | 1.76  | 1.44  | 1.30 | 1.50  |
| 20  | 0.00341 | 0.521 | 0.428 | 0.902  | 2.31  | 1.89  | 13.30  | 0.0149 | 1.56   | 2.23  | 1.74  | 1.30 | 1.82  |
| 25  | 0.00335 | 0.550 | 0.500 | 1.000  | 2.50  | 2.00  | 14.30  | 0.0160 | 1.70   | 2.50  | 1.90  | 1.30 | 2.00  |
| 30  | 0.00330 | 0.580 | 0.581 | 1.105  | 2.70  | 2.11  | 15.33  | 0.0171 | 1.79   | 2.79  | 2.07  | 1.30 | 2.19  |
| 40  | 0.00319 | 0.641 | 0.774 | 1.338  | 3.11  | 2.35  | 17.52  | 0.0195 | 2.04   | 3.43  | 2.44  | 1.30 | 2.59  |
| 50  | 0.00309 | 0.704 | 1.012 | 1.599  | 3.56  | 2.60  | 19.84  | 0.0220 | 2.33   | 4.16  | 2.85  | 1.30 | 3.04  |
| 60  | 0.00300 | 0.769 | 1.303 | 1.892  | 4.04  | 2.86  | 22.31  | 0.0247 | 2.68   | 4.99  | 3.30  | 1.30 | 3.53  |
| 70  | 0.00291 | 0.835 | 1.653 | 2.217  | 4.55  | 3.12  | 24.92  | 0.0275 | 3.06   | 5.92  | 3.78  | 1.30 | 4.06  |
| 80  | 0.00283 | 0.903 | 2.068 | 2.574  | 5.09  | 3.39  | 27.66  | 0.0305 | 3.46   | 6.96  | 4.30  | 1.30 | 4.64  |
| 90  | 0.00275 | 0.973 | 2.557 | 2.964  | 5.66  | 3.67  | 30.52  | 0.0336 | 3.90   | 8.11  | 4.86  | 1.30 | 5.26  |
| 100 | 0.00268 | 1.044 | 3.124 | 3.388  | 6.25  | 3.95  | 33.50  | 0.0368 | 4.35   | 9.37  | 5.45  | 1.30 | 5.93  |
| 110 | 0.00261 | 1.115 | 3.779 | 3.845  | 6.88  | 4.24  | 36.60  | 0.0401 | 4.84   | 10.75 | 6.08  | 1.30 | 6.63  |
| 120 | 0.00254 | 1.188 | 4.526 | 4.336  | 7.53  | 4.54  | 39.80  | 0.0435 | 5.35   | 12.25 | 6.75  | 1.30 | 7.38  |
| 130 | 0.00248 | 1.261 | 5.373 | 4.861  | 8.20  | 4.83  | 43.10  | 0.0470 | 5.91   | 13.86 | 7.45  | 1.30 | 8.17  |
| 140 | 0.00242 | 1.335 | 6.325 | 5.419  | 8.90  | 5.14  | 46.49  | 0.0506 | 6.52   | 15.59 | 8.18  | 1.30 | 9.00  |
| 145 | 0.00239 | 1.373 | 6.843 | 5.710  | 9.26  | 5.29  | 48.22  | 0.0525 | 6.85   | 16.50 | 8.56  | 1.30 | 9.43  |
| 150 | 0.00236 | 1.410 | 7.389 | 6.010  | 9.62  | 5.44  | 49.97  | 0.0543 | 7.20   | 17.44 | 8.94  | 1.30 | 9.87  |
| 160 | 0.00231 | 1.467 | 6.578 | 6.634  | 10.36 | 5.75  | 53.54  | 0.0581 | 7.97   | 19.41 | 9.74  | 1.30 | 10.78 |
| 170 | 0.00226 | 1.519 | 5.558 | 7.290  | 11.12 | 6.06  | 57.18  | 0.0619 | 8.84   | 21.49 | 10.57 | 1.30 | 11.73 |
| 180 | 0.00221 | 1.564 | 4.479 | 7.977  | 11.90 | 6.37  | 60.89  | 0.0659 | 9.85   | 23.70 | 11.42 | 1.30 | 12.71 |
| 190 | 0.00216 | 1.603 | 3.460 | 8.696  | 12.70 | 6.69  | 64.67  | 0.0699 | 11.04  | 26.02 | 12.31 | 1.30 | 13.72 |
| 200 | 0.00211 | 1.635 | 2.576 | 9.445  | 13.51 | 7.00  | 68.50  | 0.0739 | 12.43  | 28.45 | 13.22 | 1.30 | 14.77 |
| 210 | 0.00207 | 1.659 | 1.859 | 10.223 | 14.34 | 7.32  | 72.39  | 0.0780 | 14.08  | 31.00 | 14.15 | 1.30 | 15.85 |
| 220 | 0.00203 | 1.677 | 1.307 | 11.030 | 15.19 | 7.64  | 76.33  | 0.0822 | 16.04  | 33.66 | 15.11 | 1.30 | 16.96 |
| 230 | 0.00199 | 1.688 | 0.901 | 11.865 | 16.04 | 7.95  | 80.32  | 0.0863 | 18.41  | 36.43 | 16.09 | 1.30 | 18.09 |
| 240 | 0.00195 | 1.692 | 0.612 | 12.726 | 16.91 | 8.27  | 84.35  | 0.0906 | 21.26  | 39.30 | 17.10 | 1.30 | 19.26 |
| 250 | 0.00191 | 1.689 | 0.411 | 13.614 | 17.79 | 8.59  | 88.41  | 0.0948 | 24.72  | 42.28 | 18.12 | 1.30 | 20.45 |
| 260 | 0.00188 | 1.681 | 0.275 | 14.527 | 18.68 | 8.91  | 92.50  | 0.0991 | 28.93  | 45.36 | 19.17 | 1.30 | 21.67 |
| 270 | 0.00184 | 1.667 | 0.184 | 15.464 | 19.58 | 9.22  | 96.63  | 0.1034 | 34.08  | 48.53 | 20.23 | 1.30 | 22.91 |
| 280 | 0.00181 | 1.648 | 0.123 | 16.424 | 20.48 | 9.54  | 100.77 | 0.1078 | 40.41  | 51.81 | 21.31 | 1.30 | 24.17 |
| 290 | 0.00178 | 1.625 | 0.083 | 17.407 | 21.40 | 9.85  | 104.94 | 0.1121 | 48.21  | 55.17 | 22.41 | 1.30 | 25.45 |
| 300 | 0.00174 | 1.597 | 0.056 | 18.411 | 22.32 | 10.17 | 109.13 | 0.1165 | 57.88  | 58.63 | 23.52 | 1.30 | 26.76 |
| 310 | 0.00171 | 1.565 | 0.039 | 19.435 | 23.24 | 10.48 | 113.33 | 0.1209 | 69.89  | 62.17 | 24.65 | 1.30 | 28.08 |
| 320 | 0.00169 | 1.531 | 0.027 | 20.480 | 24.18 | 10.79 | 117.55 | 0.1252 | 84.86  | 65.79 | 25.79 | 1.30 | 29.42 |
| 330 | 0.00166 | 1.493 | 0.019 | 21.542 | 25.11 | 11.10 | 121.77 | 0.1296 | 103.60 | 69.50 | 26.94 | 1.30 | 30.77 |
| 340 | 0.00163 | 1.454 | 0.014 | 22.623 | 26.05 | 11.40 | 126.00 | 0.1340 | 127.13 | 73.28 | 28.11 | 1.30 | 32.14 |
| 350 | 0.00160 | 1.412 | 0.010 | 23.721 | 27.00 | 11.71 | 130.23 | 0.1384 | 156.74 | 77.14 | 29.28 | 1.30 | 33.53 |

**Table S2 (Continued)**

| °C  | 1/K     | R13   | R14  | R15   | R16    | R17    | R18    | R19   | R20   | R21   | R22  | R23   | R24    |
|-----|---------|-------|------|-------|--------|--------|--------|-------|-------|-------|------|-------|--------|
| 0   | 0.00366 | 1.26  | 1.28 | 1.26  | 1.048  | 2.579  | 1.382  | 1.26  | 1.26  | 0.80  | 0.98 | 0.82  | 0.0005 |
| 10  | 0.00353 | 1.53  | 1.51 | 1.53  | 1.376  | 3.036  | 1.681  | 1.53  | 1.53  | 0.95  | 1.06 | 0.99  | 0.0009 |
| 20  | 0.00341 | 1.83  | 1.77 | 1.83  | 1.773  | 3.535  | 2.017  | 1.83  | 1.83  | 1.11  | 1.15 | 1.19  | 0.0016 |
| 25  | 0.00335 | 2.00  | 1.90 | 2.00  | 2.000  | 3.800  | 2.200  | 2.00  | 2.00  | 1.20  | 1.20 | 1.30  | 0.0021 |
| 30  | 0.00330 | 2.17  | 2.04 | 2.17  | 2.247  | 4.075  | 2.392  | 2.17  | 2.17  | 1.29  | 1.25 | 1.41  | 0.0027 |
| 40  | 0.00319 | 2.55  | 2.33 | 2.55  | 2.805  | 4.655  | 2.806  | 2.55  | 2.55  | 1.48  | 1.34 | 1.66  | 0.0044 |
| 50  | 0.00309 | 2.96  | 2.65 | 2.96  | 3.453  | 5.273  | 3.260  | 2.96  | 2.96  | 1.68  | 1.43 | 1.93  | 0.0070 |
| 60  | 0.00300 | 3.41  | 2.98 | 3.41  | 4.199  | 5.930  | 3.753  | 3.41  | 3.41  | 1.90  | 1.52 | 2.22  | 0.0107 |
| 70  | 0.00291 | 3.89  | 3.33 | 3.89  | 5.048  | 6.622  | 4.284  | 3.89  | 3.89  | 2.13  | 1.62 | 2.53  | 0.0161 |
| 80  | 0.00283 | 4.41  | 3.70 | 4.41  | 6.005  | 7.350  | 4.855  | 4.41  | 4.41  | 2.37  | 1.71 | 2.87  | 0.0236 |
| 90  | 0.00275 | 4.97  | 4.09 | 4.97  | 7.076  | 8.110  | 5.464  | 4.97  | 4.97  | 2.63  | 1.80 | 3.23  | 0.0338 |
| 100 | 0.00268 | 5.56  | 4.49 | 5.56  | 8.265  | 8.902  | 6.111  | 5.56  | 5.56  | 2.89  | 1.89 | 3.61  | 0.0476 |
| 110 | 0.00261 | 6.18  | 4.91 | 6.18  | 9.576  | 9.725  | 6.794  | 6.18  | 6.18  | 3.17  | 1.98 | 4.01  | 0.0587 |
| 120 | 0.00254 | 6.83  | 5.34 | 6.83  | 11.012 | 10.575 | 7.513  | 6.83  | 6.83  | 3.46  | 2.08 | 4.44  | 0.0717 |
| 130 | 0.00248 | 7.52  | 5.79 | 7.52  | 12.576 | 11.452 | 8.267  | 7.52  | 7.52  | 3.75  | 2.17 | 4.89  | 0.0866 |
| 140 | 0.00242 | 8.23  | 6.25 | 8.23  | 14.270 | 12.354 | 9.054  | 8.23  | 8.23  | 4.06  | 2.26 | 5.35  | 0.1037 |
| 145 | 0.00239 | 8.60  | 6.49 | 8.60  | 15.166 | 12.814 | 9.460  | 8.60  | 8.60  | 4.21  | 2.30 | 5.59  | 0.1131 |
| 150 | 0.00236 | 8.98  | 6.73 | 8.98  | 16.095 | 13.280 | 9.874  | 8.98  | 8.98  | 4.37  | 2.34 | 5.83  | 0.1231 |
| 160 | 0.00231 | 9.75  | 7.01 | 9.75  | 18.054 | 14.227 | 10.725 | 9.75  | 9.75  | 4.69  | 2.43 | 6.34  | 0.1450 |
| 170 | 0.00226 | 10.55 | 7.27 | 10.55 | 20.146 | 15.194 | 11.606 | 10.55 | 10.55 | 5.03  | 2.52 | 6.86  | 0.1696 |
| 180 | 0.00221 | 11.38 | 7.51 | 11.38 | 22.372 | 16.180 | 12.516 | 11.38 | 11.38 | 5.36  | 2.61 | 7.40  | 0.1969 |
| 190 | 0.00216 | 12.23 | 7.72 | 12.23 | 24.732 | 17.184 | 13.453 | 12.23 | 12.23 | 5.71  | 2.69 | 7.95  | 0.2271 |
| 200 | 0.00211 | 13.11 | 7.92 | 13.11 | 27.226 | 18.203 | 14.417 | 13.11 | 13.11 | 6.06  | 2.78 | 8.52  | 0.2604 |
| 210 | 0.00207 | 14.00 | 8.10 | 14.00 | 29.851 | 19.237 | 15.405 | 14.00 | 14.00 | 6.41  | 2.86 | 9.10  | 0.2969 |
| 220 | 0.00203 | 14.92 | 8.26 | 14.92 | 32.608 | 20.284 | 16.416 | 14.92 | 14.92 | 6.77  | 2.94 | 9.70  | 0.3368 |
| 230 | 0.00199 | 15.86 | 8.40 | 15.86 | 35.495 | 21.343 | 17.450 | 15.86 | 15.86 | 7.14  | 3.02 | 10.31 | 0.3800 |
| 240 | 0.00195 | 16.82 | 8.53 | 16.82 | 38.510 | 22.413 | 18.505 | 16.82 | 16.82 | 7.51  | 3.10 | 10.93 | 0.4268 |
| 250 | 0.00191 | 17.80 | 8.64 | 17.80 | 41.650 | 23.493 | 19.580 | 17.80 | 17.80 | 7.88  | 3.18 | 11.57 | 0.4773 |
| 260 | 0.00188 | 18.79 | 8.73 | 18.79 | 44.915 | 24.581 | 20.673 | 18.79 | 18.79 | 8.26  | 3.26 | 12.22 | 0.5315 |
| 270 | 0.00184 | 19.80 | 8.81 | 19.80 | 48.301 | 25.677 | 21.784 | 19.80 | 19.80 | 8.64  | 3.34 | 12.87 | 0.5895 |
| 280 | 0.00181 | 20.83 | 8.88 | 20.83 | 51.806 | 26.779 | 22.911 | 20.83 | 20.83 | 9.03  | 3.41 | 13.54 | 0.6514 |
| 290 | 0.00178 | 21.87 | 8.94 | 21.87 | 55.428 | 27.887 | 24.053 | 21.87 | 21.87 | 9.41  | 3.49 | 14.21 | 0.7172 |
| 300 | 0.00174 | 22.92 | 8.99 | 22.92 | 59.163 | 29.000 | 25.209 | 22.92 | 22.92 | 9.80  | 3.56 | 14.90 | 0.7871 |
| 310 | 0.00171 | 23.98 | 9.03 | 23.98 | 63.008 | 30.116 | 26.378 | 23.98 | 23.98 | 10.19 | 3.63 | 15.59 | 0.8610 |
| 320 | 0.00169 | 25.05 | 9.06 | 25.05 | 66.961 | 31.236 | 27.560 | 25.05 | 25.05 | 10.58 | 3.71 | 16.29 | 0.9389 |
| 330 | 0.00166 | 26.14 | 9.08 | 26.14 | 71.019 | 32.359 | 28.752 | 26.14 | 26.14 | 10.97 | 3.78 | 16.99 | 1.0211 |
| 340 | 0.00163 | 27.23 | 9.10 | 27.23 | 75.178 | 33.483 | 29.955 | 27.23 | 27.23 | 11.37 | 3.85 | 17.70 | 1.1073 |
| 350 | 0.00160 | 28.33 | 9.11 | 28.33 | 79.435 | 34.608 | 31.167 | 28.33 | 28.33 | 11.76 | 3.91 | 18.42 | 1.1977 |

**Table S2 (Continued)**

| °C  | 1/K     | R25    | R26   | R27   | R28  | R29   | R30   | R31   | R32   | R33   | R34  | R35  | R25    |
|-----|---------|--------|-------|-------|------|-------|-------|-------|-------|-------|------|------|--------|
| 0   | 0.00366 | 0.0021 | 1.13  | 0.44  | 0.21 | 1.38  | 1.26  | 3.14  | 3.14  | 0.63  | 0.09 | 0.41 | 0.0021 |
| 10  | 0.00353 | 0.0025 | 1.38  | 0.55  | 0.26 | 1.68  | 1.53  | 3.82  | 3.82  | 0.76  | 0.11 | 0.50 | 0.0025 |
| 20  | 0.00341 | 0.0030 | 1.65  | 0.68  | 0.32 | 2.02  | 1.83  | 4.58  | 4.58  | 0.92  | 0.14 | 0.61 | 0.0030 |
| 25  | 0.00335 | 0.0033 | 1.80  | 0.75  | 0.35 | 2.20  | 2.00  | 5.00  | 5.00  | 1.00  | 0.15 | 0.66 | 0.0033 |
| 30  | 0.00330 | 0.0036 | 1.96  | 0.82  | 0.38 | 2.39  | 2.17  | 5.44  | 5.44  | 1.09  | 0.16 | 0.72 | 0.0036 |
| 40  | 0.00319 | 0.0042 | 2.30  | 0.99  | 0.46 | 2.81  | 2.55  | 6.38  | 6.38  | 1.28  | 0.19 | 0.84 | 0.0042 |
| 50  | 0.00309 | 0.0049 | 2.67  | 1.17  | 0.55 | 3.26  | 2.96  | 7.41  | 7.41  | 1.48  | 0.22 | 0.98 | 0.0049 |
| 60  | 0.00300 | 0.0056 | 3.07  | 1.37  | 0.64 | 3.75  | 3.41  | 8.53  | 8.53  | 1.71  | 0.26 | 1.13 | 0.0056 |
| 70  | 0.00291 | 0.0064 | 3.51  | 1.59  | 0.74 | 4.28  | 3.89  | 9.74  | 9.74  | 1.95  | 0.29 | 1.29 | 0.0064 |
| 80  | 0.00283 | 0.0073 | 3.97  | 1.83  | 0.85 | 4.86  | 4.41  | 11.03 | 11.03 | 2.21  | 0.33 | 1.46 | 0.0073 |
| 90  | 0.00275 | 0.0082 | 4.47  | 2.09  | 0.98 | 5.46  | 4.97  | 12.42 | 12.42 | 2.48  | 0.37 | 1.64 | 0.0082 |
| 100 | 0.00268 | 0.0092 | 5.00  | 2.37  | 1.11 | 6.11  | 5.56  | 13.89 | 13.89 | 2.78  | 0.42 | 1.83 | 0.0092 |
| 110 | 0.00261 | 0.0102 | 5.56  | 2.67  | 1.25 | 6.79  | 6.18  | 15.44 | 15.44 | 3.09  | 0.46 | 2.04 | 0.0102 |
| 120 | 0.00254 | 0.0113 | 6.15  | 2.99  | 1.40 | 7.51  | 6.83  | 17.08 | 17.08 | 3.42  | 0.51 | 2.25 | 0.0113 |
| 130 | 0.00248 | 0.0124 | 6.76  | 3.33  | 1.56 | 8.27  | 7.52  | 18.79 | 18.79 | 3.76  | 0.56 | 2.48 | 0.0124 |
| 140 | 0.00242 | 0.0136 | 7.41  | 3.69  | 1.72 | 9.05  | 8.23  | 20.58 | 20.58 | 4.12  | 0.62 | 2.72 | 0.0136 |
| 145 | 0.00239 | 0.0142 | 7.74  | 3.88  | 1.81 | 9.46  | 8.60  | 21.50 | 21.50 | 4.30  | 0.65 | 2.84 | 0.0142 |
| 150 | 0.00236 | 0.0148 | 8.08  | 4.07  | 1.90 | 9.87  | 8.98  | 22.44 | 22.44 | 4.49  | 0.67 | 2.96 | 0.0148 |
| 160 | 0.00231 | 0.0161 | 8.78  | 4.47  | 2.09 | 10.73 | 9.75  | 24.38 | 24.38 | 4.88  | 0.73 | 3.22 | 0.0161 |
| 170 | 0.00226 | 0.0174 | 9.50  | 4.89  | 2.28 | 11.61 | 10.55 | 26.38 | 26.38 | 5.28  | 0.79 | 3.48 | 0.0174 |
| 180 | 0.00221 | 0.0188 | 10.24 | 5.32  | 2.48 | 12.52 | 11.38 | 28.45 | 28.45 | 5.69  | 0.85 | 3.75 | 0.0188 |
| 190 | 0.00216 | 0.0202 | 11.01 | 5.77  | 2.69 | 13.45 | 12.23 | 30.58 | 30.58 | 6.12  | 0.92 | 4.04 | 0.0202 |
| 200 | 0.00211 | 0.0216 | 11.80 | 6.24  | 2.91 | 14.42 | 13.11 | 32.77 | 32.77 | 6.55  | 0.98 | 4.32 | 0.0216 |
| 210 | 0.00207 | 0.0231 | 12.60 | 6.72  | 3.14 | 15.40 | 14.00 | 35.01 | 35.01 | 7.00  | 1.05 | 4.62 | 0.0231 |
| 220 | 0.00203 | 0.0246 | 13.43 | 7.22  | 3.37 | 16.42 | 14.92 | 37.31 | 37.31 | 7.46  | 1.12 | 4.92 | 0.0246 |
| 230 | 0.00199 | 0.0262 | 14.28 | 7.74  | 3.61 | 17.45 | 15.86 | 39.66 | 39.66 | 7.93  | 1.19 | 5.24 | 0.0262 |
| 240 | 0.00195 | 0.0278 | 15.14 | 8.27  | 3.86 | 18.51 | 16.82 | 42.06 | 42.06 | 8.41  | 1.26 | 5.55 | 0.0278 |
| 250 | 0.00191 | 0.0294 | 16.02 | 8.81  | 4.11 | 19.58 | 17.80 | 44.50 | 44.50 | 8.90  | 1.33 | 5.87 | 0.0294 |
| 260 | 0.00188 | 0.0310 | 16.91 | 9.37  | 4.37 | 20.67 | 18.79 | 46.98 | 46.98 | 9.40  | 1.41 | 6.20 | 0.0310 |
| 270 | 0.00184 | 0.0327 | 17.82 | 9.94  | 4.64 | 21.78 | 19.80 | 49.51 | 49.51 | 9.90  | 1.49 | 6.54 | 0.0327 |
| 280 | 0.00181 | 0.0344 | 18.75 | 10.52 | 4.91 | 22.91 | 20.83 | 52.07 | 52.07 | 10.41 | 1.56 | 6.87 | 0.0344 |
| 290 | 0.00178 | 0.0361 | 19.68 | 11.11 | 5.18 | 24.05 | 21.87 | 54.67 | 54.67 | 10.93 | 1.64 | 7.22 | 0.0361 |
| 300 | 0.00174 | 0.0378 | 20.63 | 11.71 | 5.47 | 25.21 | 22.92 | 57.29 | 57.29 | 11.46 | 1.72 | 7.56 | 0.0378 |
| 310 | 0.00171 | 0.0396 | 21.58 | 12.33 | 5.75 | 26.38 | 23.98 | 59.95 | 59.95 | 11.99 | 1.80 | 7.91 | 0.0396 |
| 320 | 0.00169 | 0.0413 | 22.55 | 12.95 | 6.04 | 27.56 | 25.05 | 62.64 | 62.64 | 12.53 | 1.88 | 8.27 | 0.0413 |
| 330 | 0.00166 | 0.0431 | 23.52 | 13.58 | 6.34 | 28.75 | 26.14 | 65.35 | 65.35 | 13.07 | 1.96 | 8.63 | 0.0431 |
| 340 | 0.00163 | 0.0449 | 24.51 | 14.23 | 6.64 | 29.95 | 27.23 | 68.08 | 68.08 | 13.62 | 2.04 | 8.99 | 0.0449 |
| 350 | 0.00160 | 0.0468 | 25.50 | 14.88 | 6.94 | 31.17 | 28.33 | 70.83 | 70.83 | 14.17 | 2.13 | 9.35 | 0.0468 |

**Table S3.** Numerical values of the primary yields for 1 MeV electrons beam (LET = 0.23 keV/ $\mu\text{m}$ )

| $^{\circ}\text{C}$ | 1/K     | $\cdot\text{OH}$ | $\text{e}^{-}_{\text{aq}}$ | $\text{H}^{\cdot}$ | $\text{H}_3\text{O}^+$ | $\text{H}_2$ | $\text{H}_2\text{O}_2$ | $\text{H}^{\cdot}+\text{H}_2$ |
|--------------------|---------|------------------|----------------------------|--------------------|------------------------|--------------|------------------------|-------------------------------|
| 0                  | 0.00366 | 2.230            | 2.615                      | 0.504              | 2.686                  | 0.420        | 0.599                  | 0.924                         |
| 25                 | 0.00335 | 2.592            | 2.634                      | 0.606              | 2.934                  | 0.437        | 0.501                  | 1.043                         |
| 50                 | 0.00309 | 2.878            | 2.730                      | 0.632              | 3.069                  | 0.449        | 0.428                  | 1.082                         |
| 75                 | 0.00287 | 3.133            | 2.810                      | 0.639              | 3.150                  | 0.463        | 0.369                  | 1.102                         |
| 100                | 0.00268 | 3.342            | 2.918                      | 0.621              | 3.218                  | 0.476        | 0.328                  | 1.097                         |
| 125                | 0.00251 | 3.522            | 3.025                      | 0.595              | 3.280                  | 0.485        | 0.294                  | 1.080                         |
| 150                | 0.00236 | 3.700            | 3.162                      | 0.575              | 3.353                  | 0.495        | 0.271                  | 1.070                         |
| 175                | 0.00223 | 3.885            | 3.321                      | 0.566              | 3.459                  | 0.479        | 0.244                  | 1.045                         |
| 200                | 0.00211 | 4.101            | 3.435                      | 0.576              | 3.553                  | 0.489        | 0.212                  | 1.064                         |
| 250                | 0.00191 | 4.532            | 3.517                      | 0.675              | 3.640                  | 0.527        | 0.147                  | 1.202                         |
| 300                | 0.00174 | 4.772            | 3.218                      | 1.012              | 3.407                  | 0.567        | 0.094                  | 1.579                         |
| 350                | 0.00160 | 4.805            | 2.647                      | 1.609              | 2.809                  | 0.588        | 0.067                  | 2.197                         |

**Table S4.** Numerical values of the primary yields for 6.2 MeV  $^2\text{H}^+$  (LET = 11.9 keV/ $\mu\text{m}$ )

| $^{\circ}\text{C}$ | 1/K     | $\cdot\text{OH}$ | $\text{e}^{-}_{\text{aq}}$ | $\text{H}^{\cdot}$ | $\text{H}_3\text{O}^+$ | $\text{H}_2$ | $\text{H}_2\text{O}_2$ | $\text{H}^{\cdot}+\text{H}_2$ |
|--------------------|---------|------------------|----------------------------|--------------------|------------------------|--------------|------------------------|-------------------------------|
| 0                  | 0.00366 | 0.890            | 1.605                      | 0.463              | 1.457                  | 0.506        | 1.005                  | 0.969                         |
| 25                 | 0.00335 | 1.223            | 1.414                      | 0.538              | 1.674                  | 0.566        | 0.848                  | 1.104                         |
| 50                 | 0.00309 | 1.495            | 1.378                      | 0.514              | 1.778                  | 0.608        | 0.740                  | 1.122                         |
| 75                 | 0.00287 | 1.769            | 1.396                      | 0.479              | 1.861                  | 0.645        | 0.644                  | 1.124                         |
| 100                | 0.00268 | 1.985            | 1.443                      | 0.435              | 1.895                  | 0.670        | 0.578                  | 1.106                         |
| 125                | 0.00251 | 2.202            | 1.549                      | 0.382              | 1.973                  | 0.692        | 0.528                  | 1.075                         |
| 150                | 0.00236 | 2.431            | 1.692                      | 0.345              | 2.071                  | 0.718        | 0.499                  | 1.063                         |
| 175                | 0.00223 | 2.723            | 1.920                      | 0.329              | 2.261                  | 0.683        | 0.453                  | 1.012                         |
| 200                | 0.00211 | 3.089            | 2.074                      | 0.340              | 2.425                  | 0.712        | 0.404                  | 1.051                         |
| 250                | 0.00191 | 3.889            | 2.122                      | 0.499              | 2.582                  | 0.829        | 0.291                  | 1.328                         |
| 300                | 0.00174 | 4.337            | 1.548                      | 0.963              | 2.127                  | 0.965        | 0.192                  | 1.928                         |
| 350                | 0.00160 | 4.293            | 0.858                      | 1.557              | 1.317                  | 1.020        | 0.134                  | 2.577                         |

**Table S5.** Numerical values of the primary yields for 42.8 MeV Li ions (LET = 63.4 keV/ $\mu\text{m}$ )

| $^{\circ}\text{C}$ | 1/K     | $\cdot\text{OH}$ | $\text{e}^{-}_{\text{aq}}$ | $\text{H}^{\cdot}$ | $\text{H}_3\text{O}^+$ | $\text{H}_2$ | $\text{H}_2\text{O}_2$ | $\text{H}^{\cdot}+\text{H}_2$ |
|--------------------|---------|------------------|----------------------------|--------------------|------------------------|--------------|------------------------|-------------------------------|
| 0                  | 0.00366 | 0.361            | 1.313                      | 0.264              | 0.484                  | 0.641        | 1.245                  | 0.905                         |
| 25                 | 0.00335 | 0.572            | 0.967                      | 0.347              | 0.708                  | 0.727        | 1.116                  | 1.074                         |
| 50                 | 0.00309 | 0.755            | 0.869                      | 0.326              | 0.829                  | 0.758        | 1.006                  | 1.084                         |
| 75                 | 0.00287 | 0.928            | 0.832                      | 0.290              | 0.857                  | 0.782        | 0.914                  | 1.072                         |
| 100                | 0.00268 | 1.088            | 0.864                      | 0.239              | 0.865                  | 0.795        | 0.836                  | 1.034                         |
| 125                | 0.00251 | 1.244            | 0.923                      | 0.199              | 0.878                  | 0.810        | 0.785                  | 1.009                         |
| 150                | 0.00236 | 1.404            | 1.008                      | 0.167              | 0.900                  | 0.832        | 0.757                  | 0.998                         |
| 175                | 0.00223 | 1.639            | 1.201                      | 0.157              | 1.030                  | 0.771        | 0.702                  | 0.928                         |
| 200                | 0.00211 | 1.988            | 1.292                      | 0.162              | 1.156                  | 0.808        | 0.648                  | 0.970                         |
| 250                | 0.00191 | 2.956            | 1.267                      | 0.264              | 1.428                  | 1.000        | 0.504                  | 1.264                         |
| 300                | 0.00174 | 3.583            | 0.778                      | 0.530              | 1.335                  | 1.186        | 0.320                  | 1.716                         |
| 350                | 0.00160 | 3.545            | 0.379                      | 0.844              | 0.893                  | 1.219        | 0.197                  | 2.063                         |

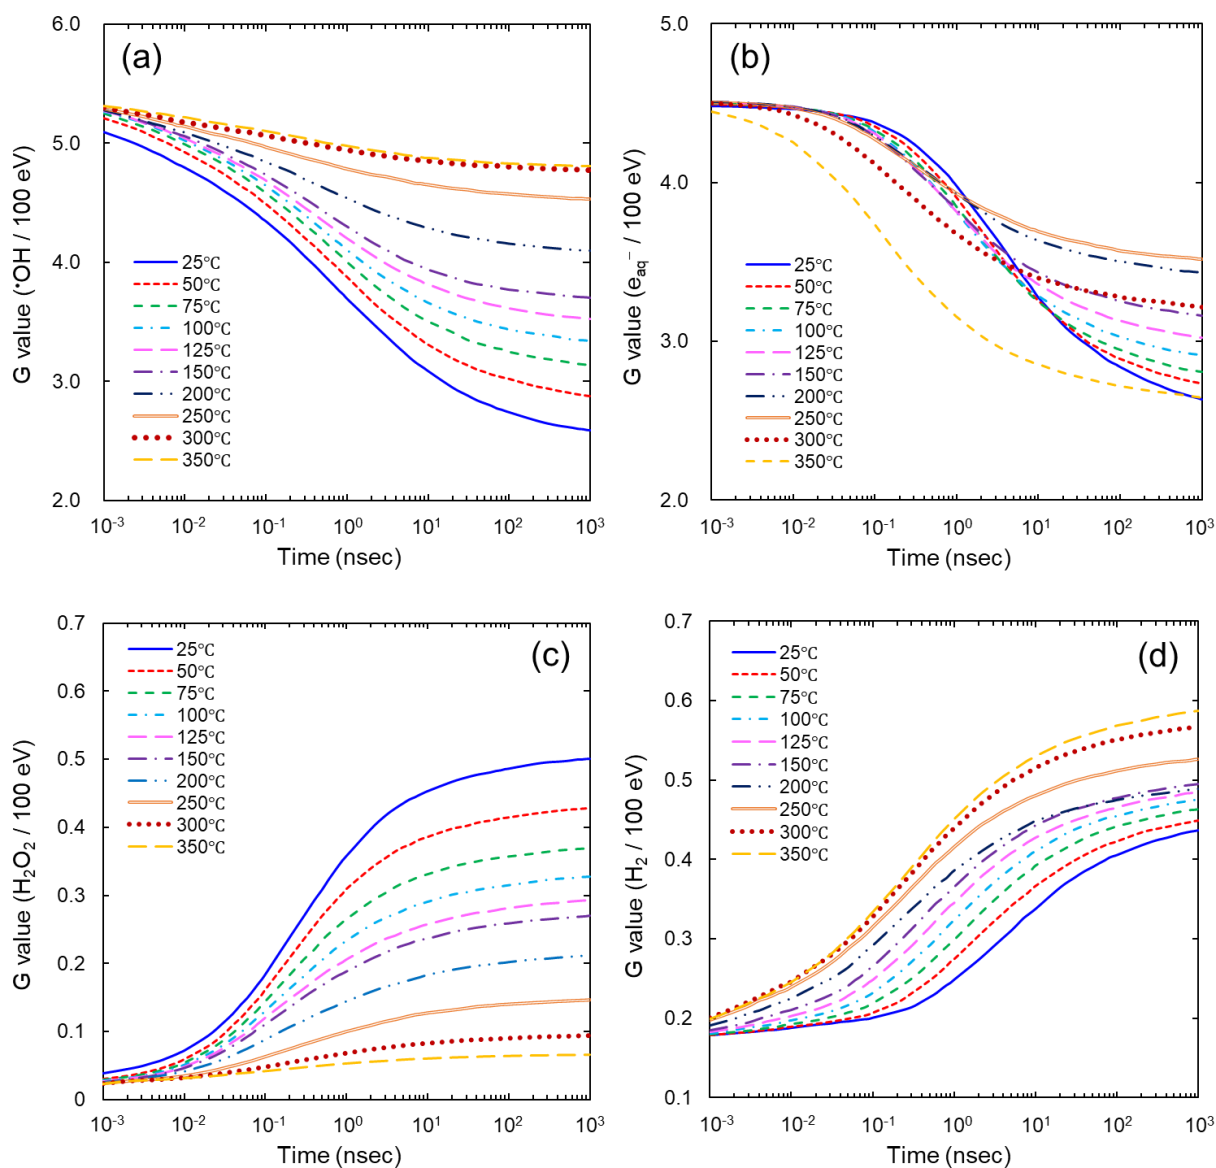

**Figure S1. Time dependence of the (a)  $\cdot\text{OH}$ , (b)  $e_{\text{aq}}^-$ , (c)  $\text{H}_2\text{O}_2$ , and (d)  $\text{H}_2$  yields under 1 MeV electron exposure.** The time-dependent G values were calculated using the PHITS-Chem code. Note that we used the PHITS-ETS model as the physical model to simulate atomic interactions of electrons in liquid water. The comparison of the primary yields between the PHITS-Chem estimation and that the literature data (corresponding experimental data and simulation results) were shown in Fig. 5 in the main text.

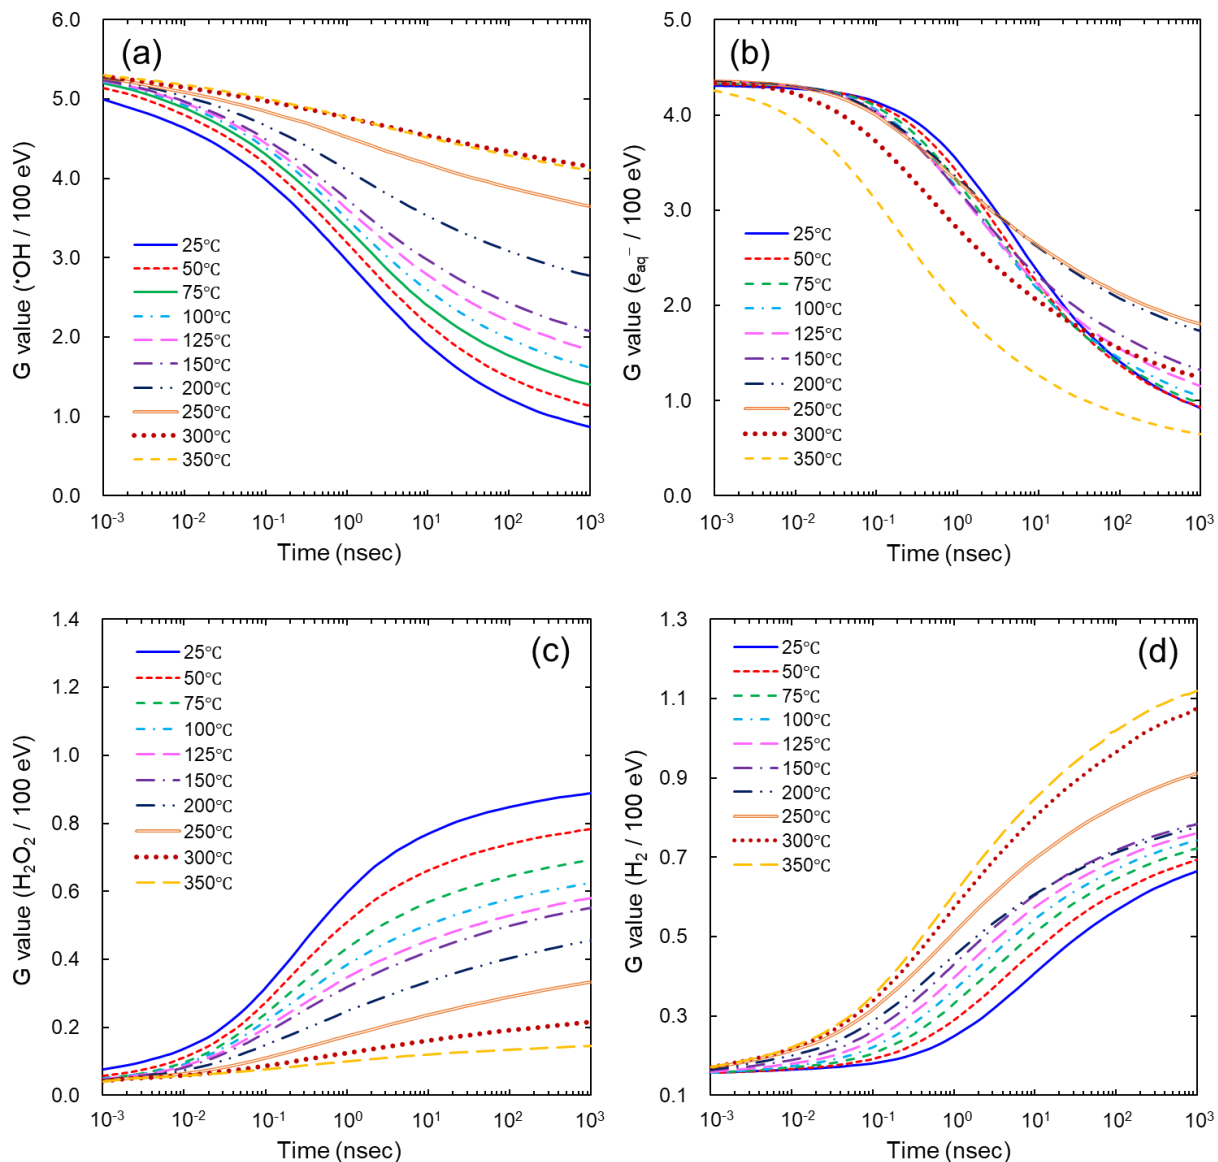

**Figure S2. Time dependence of the (a)  $\cdot\text{OH}$ , (b)  $e_{\text{aq}}^-$ , (c)  $\text{H}_2\text{O}_2$ , and (d)  $\text{H}_2$  yields under 6.2 MeV  $^2\text{H}^+$  ion exposure.** The time-dependent G values were calculated using the PHITS-Chem code in the same manner as the prediction shown in Fig. S1. We used the ITSART model as the physical model to simulate atomic interactions of ion beams in liquid water. The comparison of the primary yields between the PHITS-Chem estimation and that the literature data (corresponding experimental data) were shown in Fig. 7a in the main text.

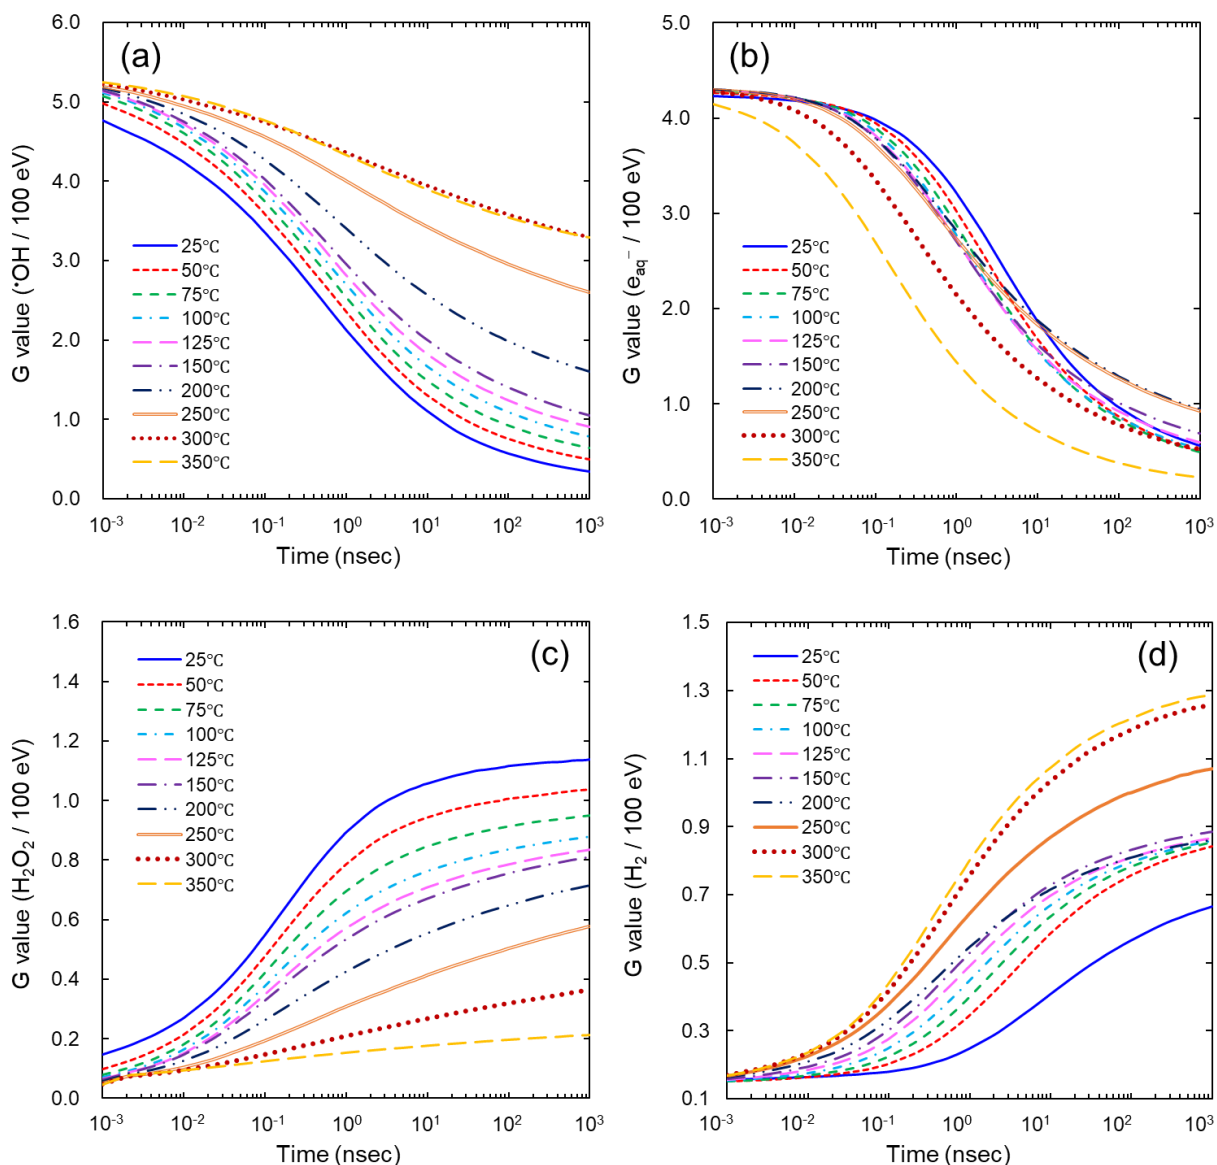

**Figure S3. Time dependence of the (a)  $\cdot\text{OH}$ , (b)  $e_{\text{aq}}^-$ , (c)  $\text{H}_2\text{O}_2$ , and (d)  $\text{H}_2$  yields under 42.8 MeV Li ion exposure.** The time-dependent G values were calculated using the PHITS-Chem code in the same manner as the prediction shown in Figs. S1 and S2. We used the ITSART model as the physical model to simulate atomic interactions of ion beams in liquid water. The comparison of the primary yields between the PHITS-Chem estimation and that the literature data (corresponding experimental data) were shown in Fig. 7b in the main text.
